# Supplementary figures and images for: Ultrafast fabrication of lignin carbon dot hydrogels with self-mending properties and dehydration-visualizable phosphorescence for chemical sensing and information encryption
Source: Royal Society of Chemistry journal article supplement (doi:10.1039/d3tc03136e), 2023-01-01

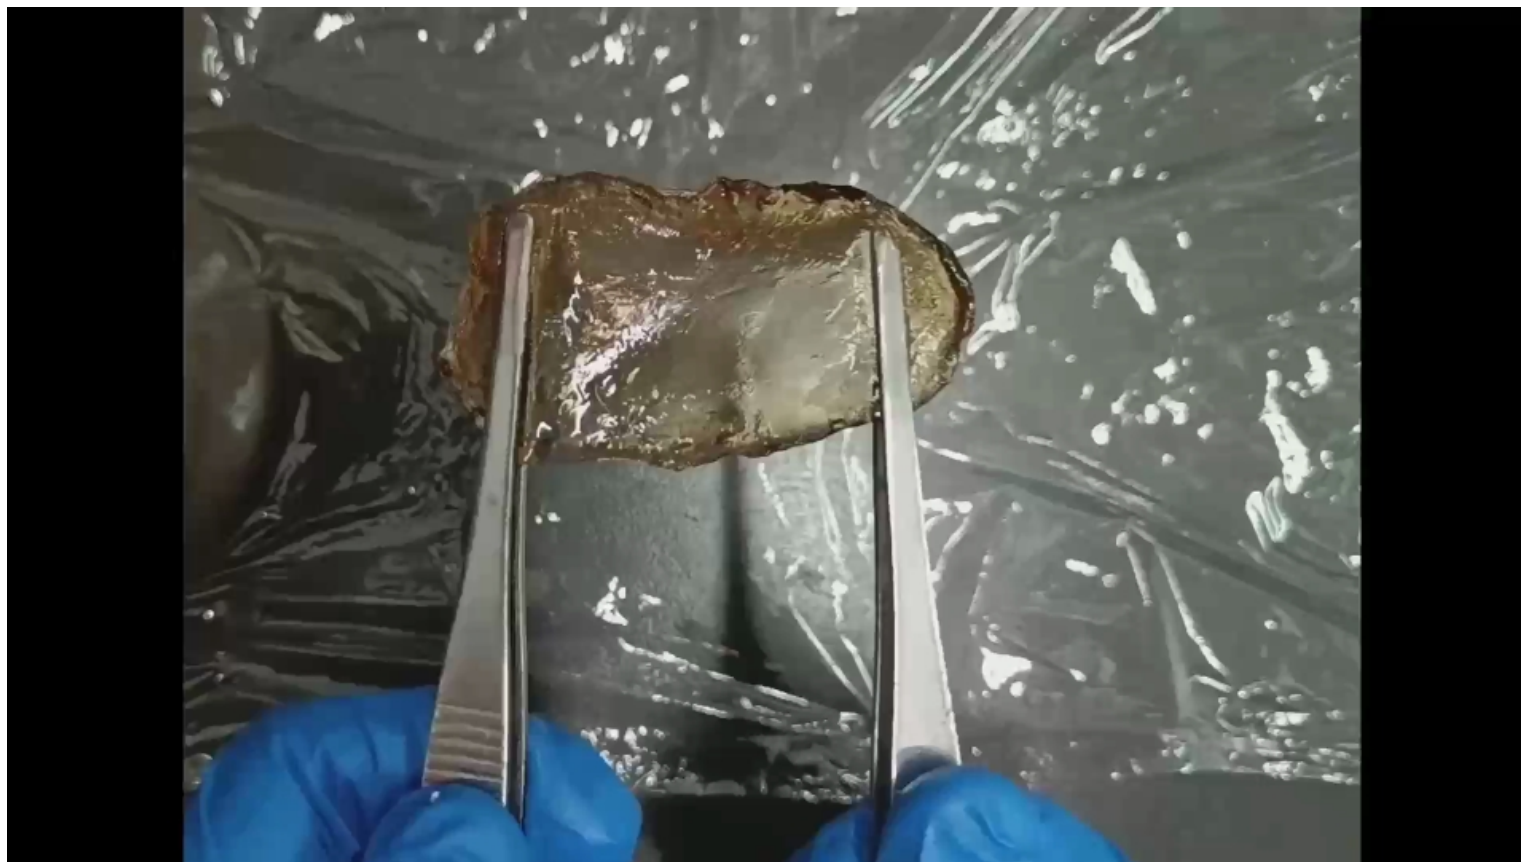

Supplement: d3tc03136e1.pdf [file d3tc03136e1.pdf]
